# Supplementary material for: HiCPlotter integrates genomic data with interaction matrices
Source: PubMed Central journal article supplement (PMC4576377; doi:10.1186/s13059-015-0767-1), 2015-09-21

Akdemir\_Additional file 4: Figure S4

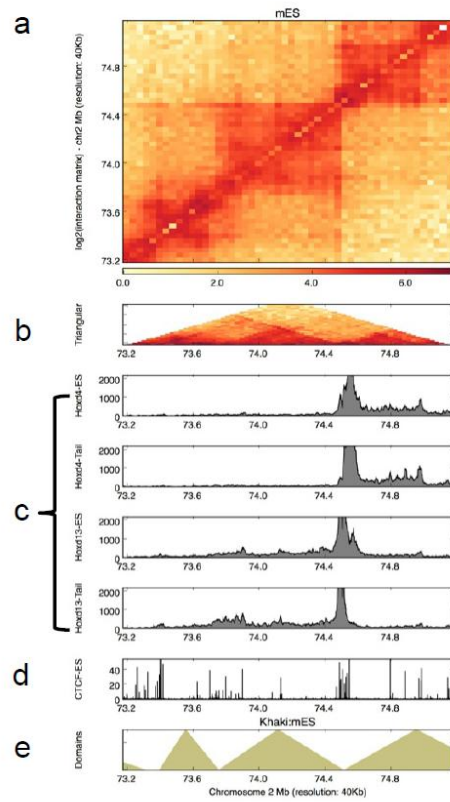

Supplement: 13059_2015_767_MOESM4_ESM.pdf [file 13059_2015_767_MOESM4_ESM.pdf]
