# Supplementary material for: HiCPlotter integrates genomic data with interaction matrices
Source: PubMed Central journal article supplement (PMC4576377; doi:10.1186/s13059-015-0767-1), 2015-09-21
Supplement: 13059_2015_767_MOESM12_ESM.pdf [file 13059_2015_767_MOESM12_ESM.pdf]

**Akdemir\_Additional file 12: Table S1 : Datasets Used in This Study**

| Publication                                                                                                         | Year | Journal         | PMID     | Accession                                                                     |
|---------------------------------------------------------------------------------------------------------------------|------|-----------------|----------|-------------------------------------------------------------------------------|
| Topological Domains In Mammalian Genomes Identified By Analysis Of Chromatin Interactions                           | 2012 | Nature          | 22495300 | GSE35156                                                                      |
| Cohesin And Ctf Differentially Affect Chromatin Architecture And Gene Expression In Human Cells                     | 2014 | PNAS            | 24335803 | GSE44267                                                                      |
| Temporal Dynamics And Developmental Memory Of 3d Chromatin Architecture At Hox Gene Loci                            | 2014 | eLife           | 24843030 | GSE55344                                                                      |
| Dna-Binding Factors Shape The Mouse Methylome At Distal Regulatory Regions                                          | 2011 | Nature          | 22170606 | GSE30206                                                                      |
| A Comparative Encyclopedia Of Dna Elements In The Mouse Genome                                                      | 2014 | Nature          | 25409824 | GSE49847                                                                      |
| The Xist Lncrna Exploits Three-Dimensional Genome Architecture To Spread Across The X Chromosome                    | 2013 | Science         | 23828888 | GSE46918                                                                      |
| Mapping And Analysis Of Chromatin State Dynamics In Nine Human Cell Types                                           | 2011 | Nature          | 21441907 | GSE26386                                                                      |
| Control Of Cell Identity Genes Occurs In Insulated Neighborhoods In Mammalian Chromosomes                           | 2014 | Cell            | 25303531 | GSE57913                                                                      |
| Convergent Evolution Of Complex Regulatory Landscapes And Pleiotropy At Hox Loci                                    | 2014 | Science         | 25414315 | GSE62269                                                                      |
| A 3d Map Of The Human Genome At Kilobase Resolution Reveals Principles Of Chromatin Looping                         | 2014 | Cell            | 25497547 | GSE63525                                                                      |
| Genome-Wide Map Of Regulatory Interactions In The Human Genome                                                      | 2014 | Genome Research | 25228660 | GSE59395                                                                      |
| Cohesin-Based Chromatin Interactions Enable Regulated Gene Expression Within Preexisting Architectural Compartments | 2014 | Genome Research | 24002784 | GSE48763                                                                      |
| Spatial Partitioning Of The Regulatory Landscape Of The X-Inactivation Centre                                       | 2014 | Nature          | 22495304 | GSE35721                                                                      |
| Integrative analysis of 111 reference human epigenomes                                                              | 2015 | Nature          | 25693563 | <a href="http://compbio.mit.edu/roadmap/">http://compbio.mit.edu/roadmap/</a> |
| Topologically Associating Domains Are Stable Units Of Replication-Timing Regulation                                 | 2014 | Nature          | 25409831 | GSE51334                                                                      |
